# Supplementary material
Source: PubMed Central journal article supplement (PMC1863501)
Supplement: pnas_0609122104_4.pdf [file pnas_0609122104_4.pdf]

**Table 1. Canine rabies control programs around the world**

| <b>Location</b>                                         | <b>Period</b> | <b>Method</b>                                         | <b>References</b> | <b>Comment</b>                                                                                                                              |
|---------------------------------------------------------|---------------|-------------------------------------------------------|-------------------|---------------------------------------------------------------------------------------------------------------------------------------------|
| <b>ASIA</b>                                             |               |                                                       |                   |                                                                                                                                             |
| Singapore                                               | 1892          | Stray dog elimination, enforcement of sanitary policy | (1)               | Successful                                                                                                                                  |
| Japan                                                   | 1956          | vaccination                                           | (2)               | First controlled in 1930, eliminated in 1956                                                                                                |
| Hong Kong                                               | 1956          | vaccination                                           | (3, 4)            | Elimination in 1956, but reintroduced in 1980                                                                                               |
| Malaysia                                                | 1953-56       | vaccination                                           | (5-8)             | Successful until civil unrest led to a decline in control activities in 1970. Sporadic cases have been recorded since the 3 month outbreak. |
| Taiwan                                                  | 1961          | vaccination                                           | (9)               | Successful                                                                                                                                  |
| Philippines (Dumagete, Siquijor, Coastal towns, Negros) | 1964-72       | vaccination                                           | (10, 11)<br>(12)  | Re-emergence when coverage dropped, rabies is now endemic across the country                                                                |
| <b>THE AMERICAS</b>                                     |               |                                                       |                   |                                                                                                                                             |
| USA                                                     | 1950-65       | vaccination, stray dog elimination and licensing laws | (9)               | Eventually resulted in elimination of domestic dog rabies throughout the country                                                            |
| Alabama, USA                                            | 1937-44       | vaccination                                           | (13)              | Small scale success but not enforced in all counties                                                                                        |
| New York State, USA                                     | 1946-48       | vaccination                                           | (14, 15)          | Successful, although wildlife rabies is endemic                                                                                             |
| Memphis, USA                                            | 1948          | vaccination                                           | (16)              | Successful                                                                                                                                  |
| Houston, USA                                            | 1953-55       | vaccination                                           | (16)              | Successful                                                                                                                                  |
| Phoenix & Maricopa, Arizona, USA                        | 1962          | vaccination                                           | (17)              | Successful                                                                                                                                  |
| California                                              | 1952-57       | vaccination                                           | (18)              | Successful, although wildlife rabies is endemic                                                                                             |
| Santiago, Chile                                         | 1962-64       | vaccination                                           | (19)              | Carried out to control a serious outbreak                                                                                                   |
| Chile                                                   | 1960          | vaccination                                           | (20, 21)          | Within ten years rabies was reduced to very low levels. No human deaths since 1990                                                          |
| Greater Buenos Aires, Argentina                         | 1976          | vaccination                                           | (22)              | free of dog rabies                                                                                                                          |
| Argentina                                               | 1977-82       | vaccination                                           | (9, 22)           | Nationwide decline in domestic dog rabies                                                                                                   |
| Lima-Callau, Peru                                       | 1982          | vaccination                                           | (22)              | free of dog rabies, but later reintroduced                                                                                                  |
| Peru                                                    | 1985          | vaccination                                           | (23)              | Reduced levels of canine rabies                                                                                                             |
| Sao Paulo, Brazil                                       | 1969          | vaccination                                           | (22)              | Successful citywide control                                                                                                                 |
| Brazil                                                  | 1981          | vaccination                                           | (24)              | Nationwide decline in domestic dog rabies                                                                                                   |
| Quayaquil, Ecuador                                      | 1985-86       | vaccination                                           | (25)<br>(26)      | When intensive vaccination campaigns implemented rabies was controlled                                                                      |
| Mexico and the Caribbean                                | 1990s         | vaccination                                           | (22, 27)          | Dramatic reductions in incidence and human deaths                                                                                           |
| <b>EUROPE</b>                                           |               |                                                       |                   |                                                                                                                                             |
| Scandinavian countries                                  | pre 1900      | Stray dog elimination, enforcement of sanitary policy | (16)              | Successful                                                                                                                                  |
| Prussia                                                 | 1875          | Stray dog elimination, enforcement of sanitary policy | (1)               | Initial success                                                                                                                             |
| UK                                                      | 1886-1903     | Stray dog elimination, enforcement of sanitary policy | (28)              | Eliminated rabies until an outbreak from 1918-22 following WWI. Eradicated through muzzle and leash restrictions and elimination of strays. |
| Czechoslovakia                                          | 1921-39       | vaccination                                           | (29)              | Mass campaigns in Slovakia, Bohemia and Kosice. Post 1947 dominated by wildlife rabies                                                      |
| Hungary                                                 | 1935-44       | vaccination                                           | (30, 31)          | Early success                                                                                                                               |
| Italy                                                   | 1950-75       | vaccination                                           | (32)              | 1 case in northern from Italy 1957-68, no cases in central Italy since 1970, since 1977 sylvatic rabies only                                |
| Yugoslavia                                              | 1946-91       | vaccination                                           | (32)              | Successful                                                                                                                                  |
| Vojvodina                                               | 1946-63       | vaccination                                           | (32)              | Successful                                                                                                                                  |
| Malaga, Spain                                           | 1975-75       | vaccination                                           | (33)              | outbreak controlled through vaccination and stray elimination                                                                               |
| Spain                                                   | 1950-1990     | vaccination                                           | (34)              | no terrestrial cases since 1979, since 1966 no human cases (except imports)                                                                 |
| <b>MIDDLE EAST &amp; NORTH AFRICA</b>                   |               |                                                       |                   |                                                                                                                                             |
| Israel                                                  | 1951          | vaccination                                           | (35-37)           | Field trial from late 1951-early 53. Subsequent implementation of compulsory vaccination and stray elimination                              |
| Tunisia                                                 | 1982          | vaccination                                           | (38-41)           | Vaccine production since 1952. National campaigns reduced rabies between 1982-87, though large epidemic occurred after campaign lapsed.     |

## References

1. West, G. P. (1972) *Rabies in Animals and Man* (David & Charles, Newton Abbot).
2. Shimada, K. (1971) in Nagano, Yasuiti And Fred M. Davenport (Ed.). *Rabies. Symposium. 406p. Illus. Maps. University Park Press: Baltimore, Md., U.S.A.; London, England*, pp. 11-28.
3. Cumming, G. G. & Rex, J. C. (1952) *Vet Rec* **64**, 105-111.
4. Cheuk, H. (1969) *Agricultural Sciences in Hong Kong* **1**, 141-174.
5. Wells, C. W. (1957) *Bulletin of the World Health Organization* **17**, 1025-1029.
6. Wells, C. W. (1954) *Bull World Health Organ* **10**, 731-742.
7. Tan, D. S. K. & Shukor, K. B. H. (1985) in Kuwert, E. Et Al. (Ed.). *Rabies In The Tropics; International Conference, Tunis, North Africa, Oct. 3-6, 1983. Xviii+786p. Springer-Verlag: Berlin, West Germany; New York, N.Y., Usa. Illus*, pp. 600-603.
8. Tan, D. S. K., Abdul, W. M. A., Mohd, N. K. & Beran, G. (1972) *Medical Journal of Malaysia* **27**, 107-112.
9. World Health Organisation Guidelines for Dog Rabies Control.
10. Beran, G. W. & Frith, M. (1988) *Reviews of Infectious Diseases* **10**, S672-S677.
11. Beran, G. W. & de Mira, O. (1966) *Public Health Rep* **81**, 169-173.
12. Beran, G. W., Nocete, A. P., Elvina, O., Gregorio, S. B., Moreno, R. R., Nakao, J. C., Burchett, G. A., Canizares, H. L. & Macasaet, F. F. (1972) *Southeast Asian Journal of Tropical Medicine and Public Health* **3**, 433-445.
13. Johnson, H. N. (1948) in *Proc. 49th Ann. Meeting U.S. Livestock Sanitary Assoc.*, pp. 99-107.
14. Korns, R. F. & Zeissig, A. (1948) *American Journal Of Public Health* **38**, 50-65.
15. Friend, M. (1968) *N Y Fish Game J* **15**, 71-97.
16. Tierkel, E. S. (1959) in *Advances in Veterinary Science*, eds. Brandly, C. A. & Jungherr, E. L. (Academic Press, New York, Vol. 5, pp. 183-226.
17. Kelly, T. E. (1980) *Journal of the American Veterinary and Medical Association* **177**, 1231-4.
18. Humphrey, G. L. (1966) in *Proceedings of the National Rabies Symposium*, pp. 65-72.
19. Fuenzalida, E., Palacios, R. & Borgono, M. (1966) *Symposium Series in Immunological Standardization* **1**, 339-345.
20. Ernst, S. N. & Fabrega-G, F. (1989) *Revista de Microbiologia* **20**, 121-127.
21. Ernst, S. N. & Fabrega, F. (1989) *Epidemiology and Infection* **103**, 651-658.
22. Larghi, O. P., Arrosi, J. C., Nakajata-A, J. & Villa-Nova, A. (1988) in *Campbell, J. B. And K. M. Charlton (Ed.). Developments In Veterinary Virology: Rabies. Xiii+431p. Kluwer Academic Publishers: Dordrecht, Netherlands; Boston, Massachusetts, Usa. Illus. Maps*, pp. 407-422.
23. Chomel, B., Chappuis, G., Bullon, F., Cardenas, E., Debeublain, T. D., Maufrais, M. C. & Giambruno, E. (1987) *Rev. sci. tech. Off. int. Epiz.* **6**, 97-113.
24. Belotto, A. J. (1988) *Reviews of Infectious Diseases* **10**, S693-S696.
25. Beran, G. W. & Frith, M. Urban dog ecology in Guayaquil, Ecuador, report.
26. Ministerio de salud Publica Data Mensuales de la rabies, Seccion Zoonosis, 1980-88.
27. World Health Organisation WHO Expert Consultation on Rabies: First Report.
28. Fooks, A. R., Roberts, D. H., Lynch, M., Hersteinsson, P. & Runolfsson, H. (2004) in *Historical perspective of Rabies in Europe and the Mediterranean*

- Basin*, eds. King, A. A., Fooks, A. R., Aubert, M. & Wandeler, A. (OIE (World organisation for Animal Health), Paris, France).
29. Matouch, O. (2004) in *Historical perspective of Rabies in Europe and the Mediterranean Basin*, eds. King, A. A., Fooks, A. R., Aubert, M. & Wandeler, A. (OIE (World organisation for Animal Health), Paris, France), pp. 65-75.
  30. Manninger, R. (1968) *Wiener Tieraerztliche Monatsschrift* **55**, 698-706.
  31. Lontai, I. (2004) in *Historical perspective of Rabies in Europe and the Mediterranean Basin*, eds. King, A. A., Fooks, A. R., Aubert, M. & Wandeler, A. (OIE (World organisation for Animal Health), Paris, France).
  32. Mutinelli, F., Stankov, S., Hristovski, M., Seimenis, A., Theoharakou, H. & Vodopija, I. (2004) in *Historical Perspectives of Rabies in Europe and the Mediterranean Basin*, eds. King, A. A., Fooks, A. R., Aubert, M. & Wandeler, A. I. (OIE (World organisation for animal health), Paris, France).
  33. Diaz Yubero, A. M., Zarzuela Pastor, E. & Munoz Navarro, M. (1982) *Comparative Immunology, Microbiology and Infectious Diseases* **5**, 315-320.
  34. Abellan Garcia, C., Sanchez-Serrano, L. P., Amador, R. & Rosinha, A. J. (2004) in *Historical perspective of Rabies in Europe and the Mediterranean Basin*, eds. King, A. A., Fooks, A. R., Aubert, M. & Wandeler, A. (OIE (World organisation for Animal Health), Paris, France), pp. 147-155.
  35. Yakobson, B., Manalo, D. L., Bader, K., Perl, S., Haber, A., Shahimov, B., Shechat, N. & Orgad, U. (1998) *Israel Journal of Veterinary Medicine* **53**, 114-126.
  36. Yakobson, B., David, D. & Aldomy, F. (2004) in *Historical Perspective of Rabies in Europe and the Mediterranean Basin*, eds. King, A. A., Fooks, A. R., Aubert, M. & Wandeler, A. I. (OIE (World Organisation for animal health), Paris, France).
  37. Kaplan, M. M., Goor, Y. & Tierkel, E. S. (1954) *Bull World Health Organ* **10**, 743-752.
  38. Osman, F. B. & Haddad, N. (1988) *Reviews of Infectious Diseases* **10**, S703-S706.
  39. Matter, H., Blancou, J., Benelmouffok, A., Hammami, S. & Fassi-Fehri, N. (2004) in *Historical Perspectives of Rabies in Europe and the Mediterranean Basin*, eds. King, A. A., Fooks, A. R., Aubert, M. & Wandeler, A. I. (OIE (World organisation for animal health), Paris, France).
  40. Chadli, A. (1988) *Archives de l'Institut Pasteur de Tunis* **65**, 15-27.
  41. Chadli, A., Osman, F. B. & Mayoux, M. A. (1976) *Archives de l'Institut Pasteur de Tunis* **53**, 1-16.
